# Supplementary material
Source: Royal Society of Chemistry journal article supplement (doi:10.1039/d5tc03935e)
Supplement: d5tc03935e1.pdf [file d5tc03935e1.pdf]

Supplementary Information

Table S1. A comparison of crystallographic parameters of  $Rb_2AgX_3$  ( $X = Br, Cl$ )

| Crystallographic Parameters | $Rb_2AgBr_3$ <sup>1</sup> | $Rb_2AgCl_3$ <sup>2</sup> |
|-----------------------------|---------------------------|---------------------------|
| Crystal System              | Orthorhombic              | Orthorhombic              |
| Space Group                 | Pnma                      | Pnma                      |
| a (Å)                       | 4.68                      | 4.49                      |
| b (Å)                       | 9.65                      | 9.22                      |
| c (Å)                       | 18.76                     | 17.88                     |
| $\alpha/\beta/\gamma$ (°)   | 90                        | 90                        |

Table S2. The XPS fitting results and calculated surface atomic percentage of  $Rb_2AgBr_3$ .

| Elements                      | Rb                |                   | Ag                |                   | Br                |                   |
|-------------------------------|-------------------|-------------------|-------------------|-------------------|-------------------|-------------------|
| Peak binding energy (eV)      | 3d <sub>5/2</sub> | 3d <sub>3/2</sub> | 3d <sub>5/2</sub> | 3d <sub>3/2</sub> | 3d <sub>5/2</sub> | 3d <sub>3/2</sub> |
|                               | 109.7             | 111.3             | 368.2             | 374.2             | 68.4              | 69.5              |
| Surface Atomic Percentage (%) | 28.7              |                   | 11.6              |                   | 30.5              |                   |

Table S3. The XPS fitting results and calculated surface atomic percentages of  $Rb_2AgCl_3$ .

| Elements                      | Rb                |                   | Ag                |                   | Cl                |                   |
|-------------------------------|-------------------|-------------------|-------------------|-------------------|-------------------|-------------------|
| Peak binding energy (eV)      | 3d <sub>5/2</sub> | 3d <sub>3/2</sub> | 3d <sub>5/2</sub> | 3d <sub>3/2</sub> | 2p <sub>3/2</sub> | 2p <sub>1/2</sub> |
|                               | 109.7             | 111.1             | 368.2             | 374.2             | 198.0             | 199.7             |
| Surface Atomic Percentage (%) | 33.8              |                   | 15.2              |                   | 39.2              |                   |

Table S4.  $\lambda_{max}$  values from fitted PL data of  $Rb_2AgX_3$  pellets series pressed at pressures ranging from 124.8 to 499.4 MPa against recorded powder values.

| $Rb_2AgX_3$  | PL $\lambda_{max}$ / nm |           |           |           |           |
|--------------|-------------------------|-----------|-----------|-----------|-----------|
|              | 0 MPa                   | 124.8 MPa | 249.7 MPa | 374.5 MPa | 499.4 MPa |
| $Rb_2AgCl_3$ | 585                     | 587       | 589       | 591       | 594       |

|              |     |     |     |     |     |
|--------------|-----|-----|-----|-----|-----|
| $Rb_2AgBr_3$ | 514 | 502 | 514 | 514 | 520 |
|--------------|-----|-----|-----|-----|-----|

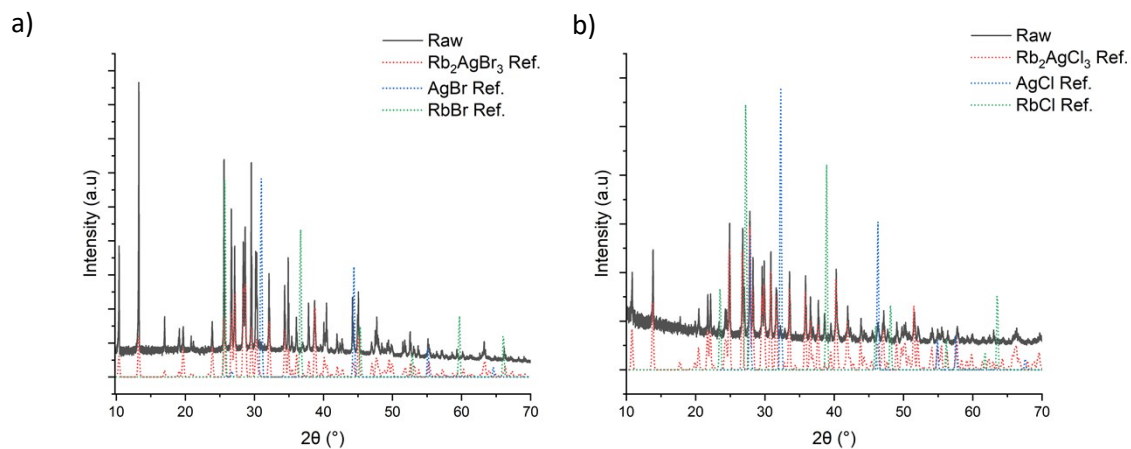

Figure S1. PXRD patterns of a)  $Rb_2AgBr_3$  and b)  $Rb_2AgCl_3$  as-synthesised powders compared to known references of precursor salts sourced from the ICSD database.<sup>33</sup>

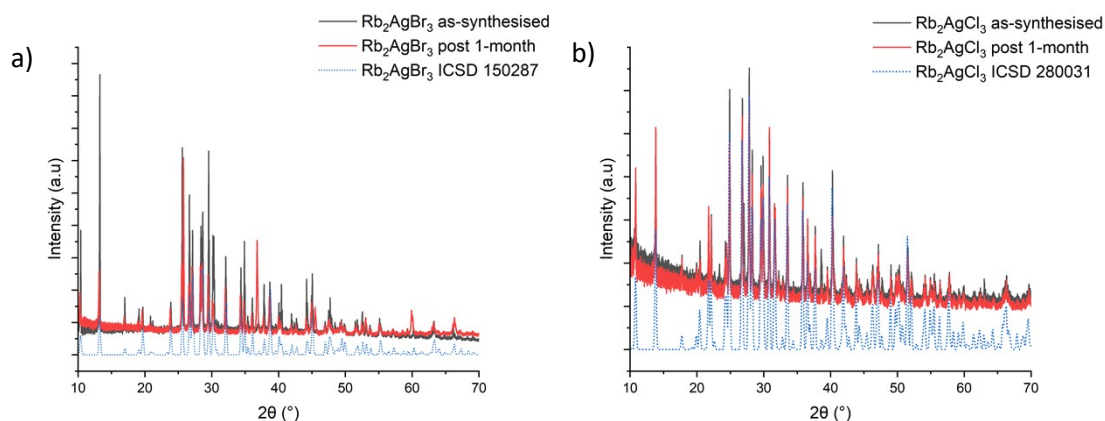

Figure S2. PXRD patterns of a)  $Rb_2AgBr_3$  and b)  $Rb_2AgCl_3$  depicting as-synthesised powders versus 1-month later accompanied by their respective reference patterns from the ICSD database.<sup>33</sup>

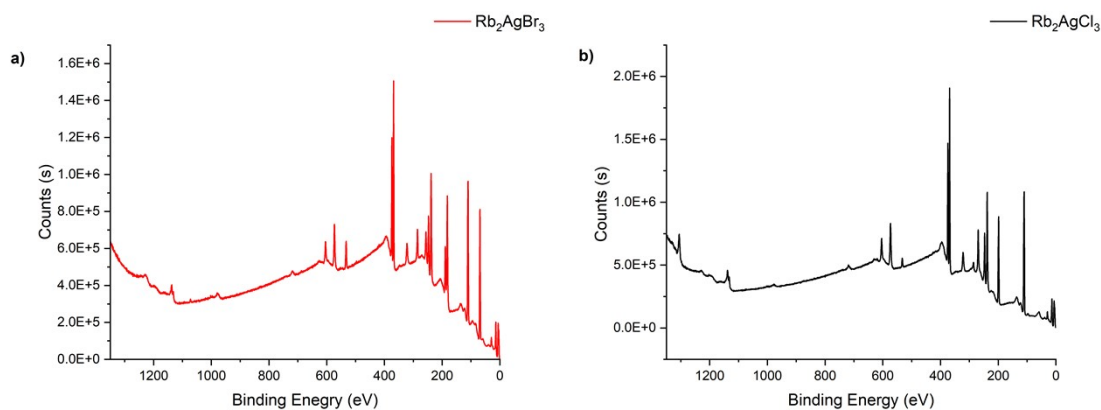

Figure S3. XPS survey spectra of a)  $Rb_2AgBr_3$  and b)  $Rb_2AgCl_3$

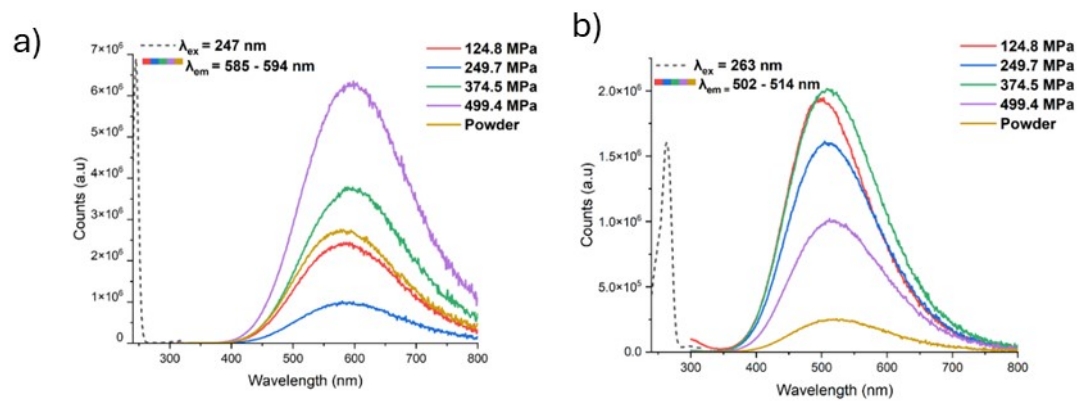

Figure S4. PL spectra of pellets of a)  $Rb_2AgCl_3$  and of b)  $Rb_2AgBr_3$  across pressures ranging from 124.8 to 499.4 MPa compared against PL data from powder measurements.

Thermal stability measurements of  $\text{Rb}_2\text{AgX}_3$

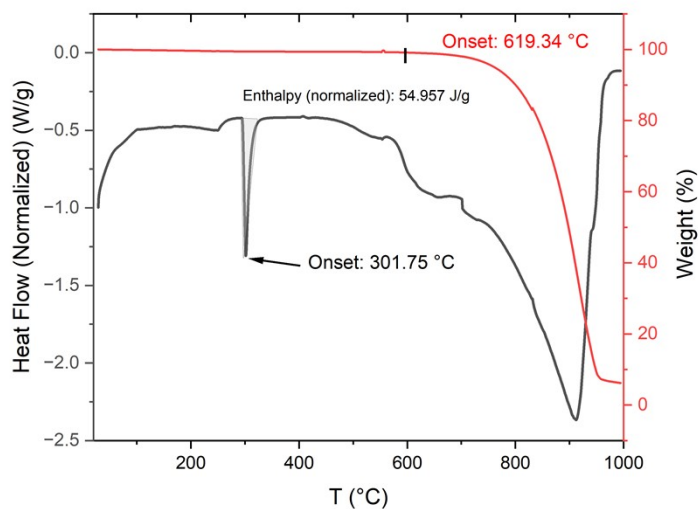

Figure S5. Thermal stability measurement of  $\text{Rb}_2\text{AgCl}_3$  depicting thermal gravimetric analysis (TGA) data (red) overlaid with differential scanning calorimetry (DSC) data (black). Both sets of measurements were run in tandem under a  $\text{N}_2$  flowing atmosphere from RT to 1000 °C at 10 °C/min.

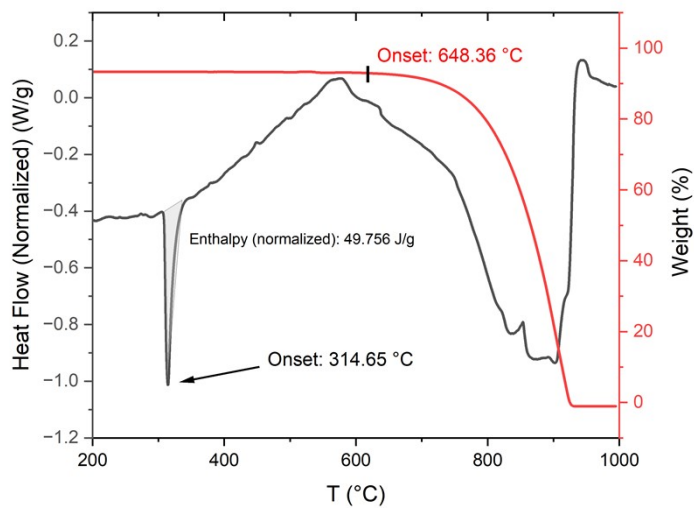

Figure S6. Thermal stability measurement of  $\text{Rb}_2\text{AgBr}_3$  depicting thermal gravimetric analysis (TGA) data (red) overlaid with differential scanning calorimetry (DSC) data (black). Both sets of measurements were run in tandem under a  $\text{N}_2$  flowing atmosphere from RT to 1000 °C at 10 °C/min.

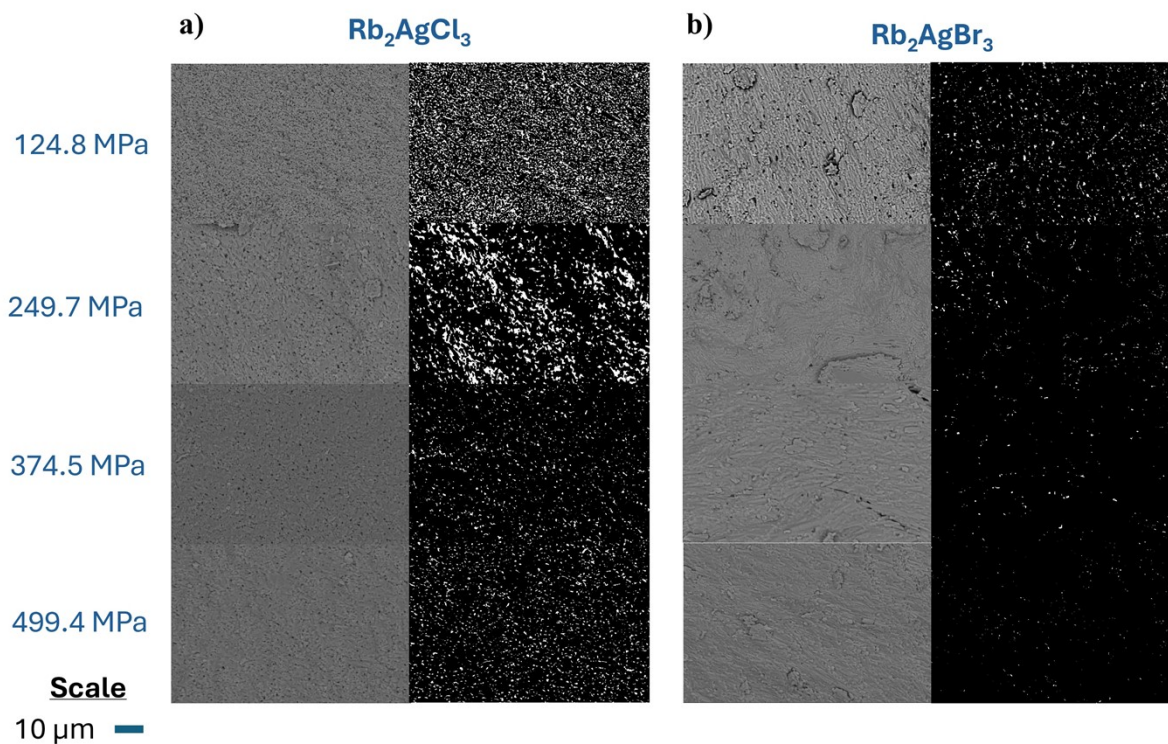

Figure S7. Cross-sectional SEM backscatter electron (BSE) images (LHS) of a)  $\text{Rb}_2\text{AgCl}_3$  and b)  $\text{Rb}_2\text{AgBr}_3$  10 mm  $\varnothing$  pellets illustrating the change in microstructure with increasing pressure from 124.8 MPa to 499.4 MPa. Images (RHS) rendered via ImageJTM showing pores (white) amongst the bulk of the material (black) that highlight the changes in void density with variation in pressure.

<sup>1</sup> S. Hull and P. Berastegui, *J Solid State Chem*, 2004, 177, 3156–3173.

<sup>2</sup> C. Hasselgren and S. Jagner, *Acta Crystallogr C*, 1999, 55, 1208–1210.
